# Supplementary material for: Hollow polylactic acid microcapsules fabricated by gas/oil/water and bubble template methods
Source: Royal Society of Chemistry journal article supplement (doi:10.1039/c3ta12587d), 2013-01-01
Supplement: c3ta12587d.pdf [file c3ta12587d.pdf]

Electronic Supplementary Information

## Hollow polylactic acid microcapsules fabricated by gas/oil/water and bubble template methods

5 Daichi Sakurai,<sup>a</sup> Jay Jesus Molino Cornejo,<sup>a</sup> Hirofumi Daiguji,<sup>\*a</sup> and Fumio Takemura<sup>b</sup>

<sup>a</sup> Division of Environmental Studies, Graduate School of Frontier Sciences, The University of Tokyo, 5-1-5 Kashiwanoha, Kashiwa 277-8563, Japan

<sup>b</sup> Energy Technology Research Institute, National Institute of Advanced Industrial Science and Technology, 1-1-1 Higashi, Tsukuba 305-8565, Japan

### 10 S1 Chemical potentials for each component in liquid and gas phases

If we assume that gas and liquid components form a weak solution in the liquid phase and an ideal mixture in the gaseous phase, then the explicit expressions for chemical potentials are as follows:

$$\mu_1'' = v_0 p_{01}'' + RT \ln \left( \frac{p_1''}{p_{01}''} \right), \quad (\text{S1})$$

$$\mu_2'' = \mu_{20}'' + RT \ln \left( \frac{p_2''}{p'} \right), \quad (\text{S2})$$

$$15 \quad \mu_1' = v_0 p' + RT \ln \left( \frac{c_2'}{c_1' + c_2'} \right) = v_0 p' - RT \ln \left( 1 + \frac{c_2'}{c_1'} \right) \approx v_0 p' - RT \ln \left( \frac{c_2'}{c_1'} \right) \quad \text{at } c_2' \ll c_1', \quad (\text{S3})$$

$$\mu_2' = \mu_{20}' + RT \ln \left( \frac{c_2'}{c_{2s}'} \right), \quad (\text{S4})$$

where  $R$  and  $T$  are the gas constant and temperature, respectively;  $v_0$ ,  $p_{01}''$ , and  $c_{2s}'$  are the specific volume of pure liquid, the saturation pressure of pure liquid, and the saturation concentration of the gas in the liquid phase, respectively;  $\mu_{20}''$  and  $\mu_{20}'$  are the chemical potentials of the gas in gaseous and liquid phases when the gas is dissolved up to the saturation concentration ( $p_2'' = p'$  and  $c_2' = c_{2s}'$ ).  
20 From the equality of chemical potentials in liquid and gas phases for each component, i.e.,  $\mu_1'' = \mu_1'$  and  $\mu_2'' = \mu_2'$ , eqs 3 and 4 can be obtained.

### S2 Stability of possible equilibrium states for bubbles in a closed volume of liquid

In our earlier study,<sup>1</sup> we obtained the condition for bubble stability from the differential of the total potential of a closed system of a  
25 liquid–gas solution containing  $q$  bubbles of radius  $r_b$  for the virtual displacement of equilibrium radius at constant  $p'$ ,  $T$ , and  $N_1$ . The condition for bubble stability was expressed as follows (eq 8 in Ref. 1):

$$q > \frac{3c_{01}' V RT}{4\pi r_b^3 K_H} \left[ \left( \frac{K_H}{p_1''} + \frac{p_1''}{K_H} - 2 \right) \frac{3p_1'' p_2'' r_b}{2\gamma K_H} - \left( \frac{K_H}{p_2''} + \frac{p_1''}{K_H} \right) \frac{p_2''}{K_H} \right]^{-1}, \quad (\text{S5})$$

where  $K_H$  is the Henry's law constant. For a weak solution, the saturation concentration of air in the liquid phase,  $c_{2s}'$ , is given by

$$c_{2s}' = c_{01}' \frac{p'}{K_H}. \quad (\text{S6})$$

30 If the total molar amount of  $\text{CH}_2\text{Cl}_2$ ,  $N_1$ , is explicitly shown using eq 1, the stability condition S5 is transformed as follows:

$$q > \frac{3N_1 RT}{4\pi r_b^3 K_H} \left[ \left( \frac{K_H}{p_1''} + \frac{p_1''}{K_H} - 2 \right) \frac{3p_1'' p_2'' r_b}{2\gamma K_H} - \left( \frac{K_H}{p_2''} + \frac{p_1''}{K_H} - \frac{p_1''}{p_2''} \right) \frac{p_2''}{K_H} \right]^{-1}. \quad (\text{S7})$$

By using eqs 3–5, 7, 8, and S6, the stability condition S7 is transformed as follows:

$$\begin{aligned}
 & -\left(\frac{3N_1RT}{q4\pi r_b^3 K_H} + 1 - \frac{p_1''}{K_H}\right) - \left(\frac{p_1'' p_2''}{K_H^2} - \frac{3r_b p_2''}{2\gamma} \left(1 - \frac{p_1''}{K_H}\right)^2\right) > 0 \\
 & \left\{ \frac{c'_{2s}}{c'_{01}} \left( N_1 - q\eta \frac{p_{01}''}{RT} \frac{4}{3} \pi r_b^3 \right) + q \frac{p'}{RT} \frac{4}{3} \pi r_b^3 \right\} \frac{d}{dr_b} \left( 1 - \eta \frac{p_{01}''}{p'} + \frac{2\gamma}{r_b p'} \right) > 0 \\
 & + \frac{d}{dr_b} \left\{ \frac{c'_{2s}}{c'_{01}} \left( N_1 - q\eta \frac{p_{01}''}{RT} \frac{4}{3} \pi r_b^3 \right) + q \frac{p'}{RT} \frac{4}{3} \pi r_b^3 \right\} \left( 1 - \eta \frac{p_{01}''}{p'} + \frac{2\gamma}{r_b p'} \right) > 0 \\
 & \frac{dN_2}{dr_b} > 0
 \end{aligned} \tag{S8}$$

This result shows that the bubble is stable at  $dN_2/dr_b > 0$  for each  $N_2$ - $r_b$  curve shown in Figs. 1a and 1b.

### S3 Radius distributions of microbubbles in a droplet of $\text{CH}_2\text{Cl}_2$ solution of PLA

Figure S1 shows a bright-field image of microbubbles inside a droplet of  $\text{CH}_2\text{Cl}_2$  solution of PLA (300 kDa) when the initial concentration of PLA in  $\text{CH}_2\text{Cl}_2$  was  $10 \text{ g L}^{-1}$ . The central part of a droplet was observed just after sonication [see Fig. 3a (center)]. The bubble size was quite uniform and did not change considerably during the observation.

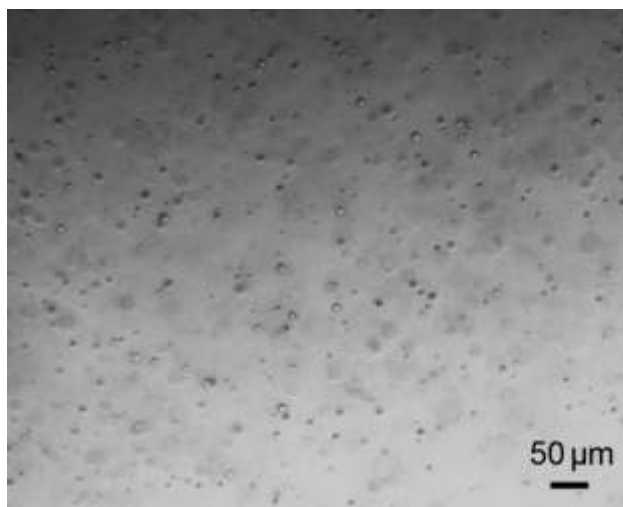

Fig. S1 Bright-field image of microbubbles inside a droplet of  $\text{CH}_2\text{Cl}_2$  solution of PLA (300 kDa). The initial concentration of PLA in  $\text{CH}_2\text{Cl}_2$  was  $10 \text{ g L}^{-1}$ .

Figure S2 shows the radius distributions of microbubbles in a droplet of  $\text{CH}_2\text{Cl}_2$  solution of PLA (300 kDa). The initial concentrations of PLA in  $\text{CH}_2\text{Cl}_2$  were 5, 10, and  $20 \text{ g L}^{-1}$ . The mean values ( $m$ ), standard deviations ( $\sigma$ ), and polydispersity indices (PI = standard deviation/mean) of the bubble radius for the initial concentrations of 5, 10, and  $20 \text{ g L}^{-1}$  were ( $m = 3.78 \text{ }\mu\text{m}$ ,  $\sigma = 1.23 \text{ }\mu\text{m}$ , and PI = 32.5%), ( $m = 4.23 \text{ }\mu\text{m}$ ,  $\sigma = 1.26 \text{ }\mu\text{m}$ , and PI = 29.8%), and ( $m = 6.34 \text{ }\mu\text{m}$ ,  $\sigma = 2.63 \text{ }\mu\text{m}$ , PI = 41.5%), respectively. As the initial concentration of PLA increased, the size increased and the uniformity deteriorated.

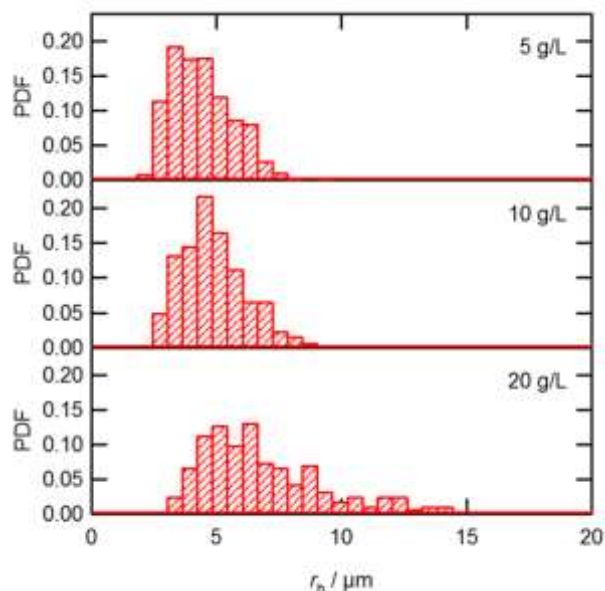

**Fig. S2** Radius distributions of microbubbles in a droplet of  $\text{CH}_2\text{Cl}_2$  solution of PLA (300 kDa). The initial concentrations of PLA in  $\text{CH}_2\text{Cl}_2$  were 5, 10, and 20  $\text{g L}^{-1}$ .

#### S4 Radius distribution of microdroplets of $\text{CH}_2\text{Cl}_2$ solution of PLA in an aqueous medium

Figure S3 shows a bright-field image of microdroplets of  $\text{CH}_2\text{Cl}_2$  solution of PLA (300 kDa) in an aqueous medium after the droplet of  $\text{CH}_2\text{Cl}_2$  solution of PLA and the surrounding aqueous solution of  $\text{CH}_2\text{Cl}_2$  were mixed by a homogenizer for 10 s at 3500 rpm. The initial concentration of PLA in  $\text{CH}_2\text{Cl}_2$  was 10  $\text{g L}^{-1}$  and the initial concentration of  $\text{CH}_2\text{Cl}_2$  in water was the saturation concentration at room temperature and atmospheric pressure. Each droplet contained several microbubbles.

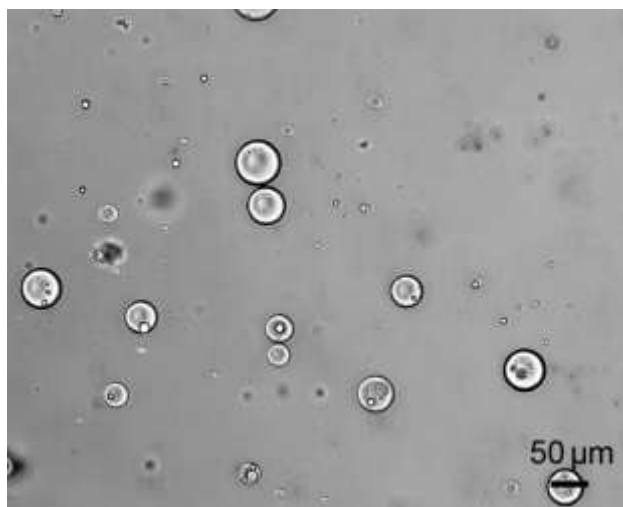

**Fig. S3** Bright-field image of microdroplets of  $\text{CH}_2\text{Cl}_2$  solution of PLA (300 kDa) in an aqueous medium after the droplet of  $\text{CH}_2\text{Cl}_2$  solution of PLA and the surrounding aqueous solution of  $\text{CH}_2\text{Cl}_2$  were mixed by a homogenizer for 10 s at 3500 rpm. The initial concentration of PLA in  $\text{CH}_2\text{Cl}_2$  was 10  $\text{g L}^{-1}$  and the initial concentration of  $\text{CH}_2\text{Cl}_2$  in water was the saturation concentration at 1 atm and room temperature.

Figure S4 shows the radius distributions of microdroplets of  $\text{CH}_2\text{Cl}_2$  solution of PLA (300 kDa) in an aqueous medium when the droplet of  $\text{CH}_2\text{Cl}_2$  solution of PLA and the surrounding aqueous solution were mixed by a homogenizer for 10 s at 2500, 3500, and 4500 rpm. The mean values ( $m$ ), standard deviations ( $\sigma$ ), and polydispersity indices (PI = standard deviation/mean) of the microdroplet radii for rotation speeds of 2500, 3500, and 4500 rpm were ( $m = 16.9 \mu\text{m}$ ,  $\sigma = 7.12 \mu\text{m}$ , and PI = 41.2%), ( $m = 13.6 \mu\text{m}$ ,  $\sigma = 8.73 \mu\text{m}$ , and PI = 64.4%), and ( $m = 14.3 \mu\text{m}$ ,  $\sigma = 8.46 \mu\text{m}$ , PI = 59.2%), respectively. As the rotation speed increased from 2500 to 3500 rpm, the size increased and the uniformity deteriorated, but the data for 3500 and 4500 rpm were close to each other.

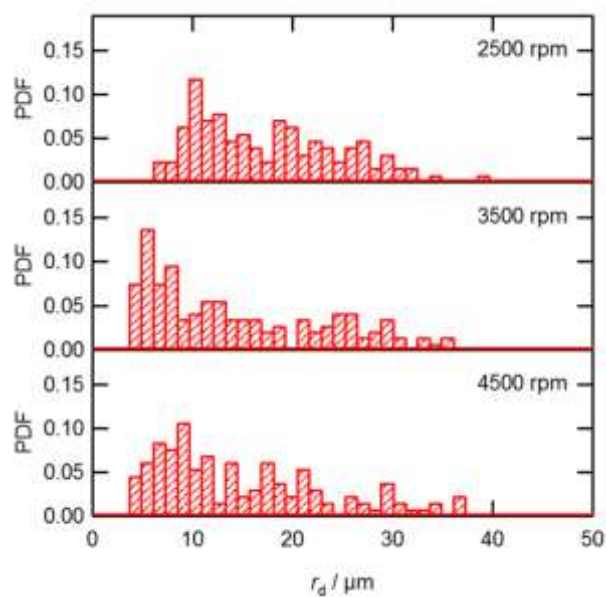

**Fig. S4** Radius distributions of microdroplets of  $\text{CH}_2\text{Cl}_2$  solution of PLA (300 kDa) in an aqueous medium when a droplet of  $\text{CH}_2\text{Cl}_2$  solution of PLA and the surrounding aqueous solution were mixed by a homogenizer for 10 s at 2500, 3500 and 4500 rpm. The initial concentration of PLA in  $\text{CH}_2\text{Cl}_2$  was  $10 \text{ g L}^{-1}$ .

5

## REFERENCES

- (1) H. Daiguji, S. Takada, J. J. Molino Cornejo and F. Takemura, *J. Phys. Chem. B* 2009, **113**, 15002–15009.
